# Supplementary material for: High-affinity P2Y2 and low-affinity P2X7 receptor interaction modulates ATP-mediated calcium signaling in murine osteoblasts
Source: PubMed Central journal article supplement (PMC8248741; doi:10.1371/journal.pcbi.1008872), 2021-06-21
Supplement: pcbi.1008872.s002.pdf [file pcbi.1008872.s002.pdf]

**S1 Table. Calcium response parameters.**

| Parameter             | Symbol         | Units                                     | Description                                                                           |
|-----------------------|----------------|-------------------------------------------|---------------------------------------------------------------------------------------|
| Activation time       | $t_{10-90\%}$  | s                                         | Time for signal to increase from 10 to 90% of peak.                                   |
| Magnitude             | -              | $\Delta[\text{Ca}^{2+}]_i$                | Amplitude of response (peak – baseline).                                              |
| Area under curve      | $AUC$          | $\Delta[\text{Ca}^{2+}]_i \cdot \text{s}$ | Area under response curve.                                                            |
| Decay time            | $\tau_{decay}$ | s                                         | Decay constant of the exponential decay region of the deactivation phase of response. |
| Oscillatory fraction  | -              | -                                         | Fraction of cells with multi-peaked (oscillatory response).                           |
| Oscillatory magnitude | $E$            | $\Delta[\text{Ca}^{2+}]_i$                | Mean magnitude of oscillatory peaks.                                                  |
| Oscillatory period    | $T$            | s                                         | Mean periodicity of oscillatory peaks.                                                |
| Oscillatory peaks     | $N_{osc}$      | -                                         | Number of observed oscillatory peaks.                                                 |
| Response fraction     | -              | -                                         | Fraction of cells with discernable calcium response.                                  |
| Signal radius         | $\rho$         | $\mu\text{m}$                             | Average distance of secondary (2°) responders from primary (1°) stimulated cell.      |

Refer to [13] for schematic-based definitions.
