# Supplementary material for: High-affinity P2Y2 and low-affinity P2X7 receptor interaction modulates ATP-mediated calcium signaling in murine osteoblasts
Source: PubMed Central journal article supplement (PMC8248741; doi:10.1371/journal.pcbi.1008872), 2021-06-21
Supplement: pcbi.1008872.s003.pdf [file pcbi.1008872.s003.pdf]

**S2 Table. Primer and PAM sequences**

| <b>Target</b>        | <b>Description</b>        | <b>Sequence (5' – 3')</b>                                        |
|----------------------|---------------------------|------------------------------------------------------------------|
| <b><i>P2ry2</i></b>  | CRISPR/Cas9; PAM sequence | Strand A: TTGGTTTATTACTACGCCCG<br>Strand B: CGGGCGTAGTAATAAACCAA |
| <b><i>P2rx7</i></b>  | CRISPR/Cas9; PAM sequence | Strand A: CTGACCGCGTTGTAAAAAG<br>Strand B: GAGCACTGTGCACCGCGCCT  |
| <b><i>P2ry1</i></b>  | qRT-PCR; primers          | Fwd: AGCAGAATGGAGACACGAGTTTG<br>Rv: GGGATGTCTTGTGACCATGTTACA     |
| <b><i>P2ry2</i></b>  | qRT-PCR; primers          | Fwd: GAAGAACTGGAGCAGGCGCT<br>Rv: CCATTGCCCTGGACCTGATC            |
| <b><i>P2ry4</i></b>  | qRT-PCR; primers          | Fwd: CTGCAAGTTCGTCCGCTTTC<br>Rv: GTATTGCCCCGAGTGGATG             |
| <b><i>P2ry6</i></b>  | qRT-PCR; primers          | Fwd: TGAAAAACAACGAGGAACACCAA<br>Rv: CAGCCTTTCCTATGCTCGGA         |
| <b><i>P2ry12</i></b> | qRT-PCR; primers          | Fwd: CCGGAGACTCATATCCTTC<br>Rv: GCCCAGATGACAACAGAAAAG            |
| <b><i>P2ry13</i></b> | qRT-PCR; primers          | Fwd: CAGCTGAGTCTCTTCCAAAACAAA<br>Rv: TGCATCCCAGTGGTGTTGAT        |
| <b><i>P2ry14</i></b> | qRT-PCR; primers          | Fwd: CCACCACAGACCCTCCAAAC<br>Rv: CAACACGGGAATGATCTGCTTT          |
| <b><i>P2rx1</i></b>  | qRT-PCR; primers          | Fwd: CAGAAAAGGAAAAGCCCAAGGTATT<br>Rv: CACGTCTTCACAGTGCCATTG      |
| <b><i>P2rx2</i></b>  | qRT-PCR; primers          | Fwd: GCTGCTCATTCTGCTTTACTTCG<br>Rv: TCCCACACTTTGTGTTCCGA         |
| <b><i>P2rx3</i></b>  | qRT-PCR; primers          | Fwd: AAGGCTTCGGACGCTATGC<br>Rv: GATGACAAAGACAGAAGTGCCCT          |
| <b><i>P2rx4</i></b>  | qRT-PCR; primers          | Fwd: AGACGGACCAGTGATGCCTAAC<br>Rv: TGGAGTGGAGACCGAGTGAGA         |
| <b><i>P2rx5</i></b>  | qRT-PCR; primers          | Fwd: GATGTGGCAGACTTTGTGCTTCC<br>Rv: CCTTCACGCTCAGCACAGATG        |
| <b><i>P2rx6</i></b>  | qRT-PCR; primers          | Fwd: ACGTGTTCTTCTGGTAACCAACT<br>Rv: TGGACATCTGCCCTGGACTT         |
| <b><i>P2rx7</i></b>  | qRT-PCR; primers          | Fwd: ACAATGTGAAAAGCGGACG<br>Rv: TCAATGCACACAGTGGCCA              |
| <b><i>Gapdh</i></b>  | qRT-PCR; primers          | Fwd: CAAGTATGATGACATCAAGAAGGTGG<br>Rv: GGAAGA-GTGGGAGTTGCTGTTG   |
