# Supplementary material for: High-affinity P2Y2 and low-affinity P2X7 receptor interaction modulates ATP-mediated calcium signaling in murine osteoblasts
Source: PubMed Central journal article supplement (PMC8248741; doi:10.1371/journal.pcbi.1008872), 2021-06-21
Supplement: pcbi.1008872.s004.pdf [file pcbi.1008872.s004.pdf]

**S3 Table. PCR cycling conditions**

| Stage                          | Description                                                                  | Cycles (n) |
|--------------------------------|------------------------------------------------------------------------------|------------|
| <b>qRT-PCR (cDNA template)</b> |                                                                              |            |
| <b>Phase 1</b>                 | Denaturation: 94 °C, 180 s                                                   | 1          |
| <b>Phase 2</b>                 | Denaturation 94 °C, 30 s<br>Annealing: 60 °C, 45 s<br>Elongation: 72 C, 60 s | 40         |
| <b>Phase 3</b>                 | Elongation: 72 °C, 600 s<br>Hold: 4 °C                                       | 1          |
